# Supplementary material for: Optimal regulation of blood glucose level in Type I diabetes using insulin and glucagon
Source: PubMed Central journal article supplement (PMC6426249; doi:10.1371/journal.pone.0213665), 2019-03-20
Supplement: pone.0213665.s001.pdf [file pone.0213665.s001.pdf]

# S1 Appendix: GIGM Model and Parameters

## Overview of GIGM Model with Type I Diabetics

We consider the model in [3,4] which is a system of nonlinear differential equations (ODEs). In all equations,  $t$  is the physical time (in min), all subscripts  $b$  denotes basal state, and all of the parameters are given in the S1 Table. The system of nonlinear differential equations are given below:

### Glucose Subsystem:

$$\dot{G}_p(t) = EGP(t) + Ra(t) - U_{ii} - E(t) - k_1 G_p(t) + k_2 G_t(t), \quad G_p(0) = G_{pb} \quad (S1a)$$

$$\dot{G}_t(t) = -U_{id}(t) + k_1 G_p(t) - k_2 G_t(t), \quad G_t(0) = G_{tb} \quad (S1b)$$

$$G(t) = \frac{G_p}{V_G}, \quad G(0) = G_b \quad (S1c)$$

Here  $G_p$  (in mg/kg) is the mass of plasma glucose;  $G_t$  (in mg/kg) is the mass of tissue glucose;  $G$  (in mg/dL) is plasma glucose concentration and  $V_g$  (in dL/kg) is the distribution volume of glucose;  $EGP$  is the endogenous glucose production (in mg/kg/min);  $Ra$  (in mg/kg/min) is the rate of glucose appearance in plasma;  $U_{ii}$  (in mg/kg/min) and  $U_{id}$  (in mg/kg/min) are insulin-independent and insulin-dependent glucose utilizations, respectively. Also  $k_1$  and  $k_2$  are the parameters.

### Insulin Subsystem:

$$\dot{I}_p(t) = -(m_2 + m_4)I_p(t) + m_1 I_l(t) + R_{ia}(t), \quad I_p(0) = I_{pb} \quad (S2a)$$

$$\dot{I}_l(t) = -(m_1 + m_3)I_l(t) + m_2 I_p(t), \quad I_l(0) = I_{lb} \quad (S2b)$$

$$I(t) = \frac{I_p(t)}{V_I}, \quad I(0) = I_b \quad (S2c)$$

Here  $I_l$  (in pmol/kg) is the mass of liver insulin;  $I_p$  (in pmol/kg) is the mass of tissue insulin;  $I$  (in pmol/L) is the plasma insulin concentration;  $V_I$  (in L/kg) is the distribution volume of insulin;  $R_{ia}$  (in pmol/kg/min) is the rate of appearance of insulin in plasma;  $m_1, m_2, m_3$  and  $m_4$  are the parameters.

### Glucose rate of appearance:

$$Q_{sto}(t) = Q_{sto1}(t) + Q_{sto2}(t), \quad G_{sto}(0) = 0 \quad (S3a)$$

$$\dot{Q}_{sto1}(t) = -k_{gri}Q_{sto1}(t) + D\delta(t - \tau_D), \quad Q_{sto1}(0) = 0 \quad (S3b)$$

$$\dot{Q}_{sto2}(t) = -k_{empt}(Q_{sto})(t)Q_{sto2}(t) + k_{gri}Q_{sto1}(t), \quad Q_{sto2}(0) = 0 \quad (S3c)$$

$$\dot{Q}_{gut}(t) = -k_{abs}Q_{gut}(t) + k_{empt}Q_{sto}(t)Q_{sto2}(t), \quad Q_{gut}(0) = 0 \quad (S3d)$$

$$Ra(t) = \frac{f \cdot k_{abs} \cdot Q_{gut}(t)}{BW}, \quad Ra(0) = 0 \quad (S3e)$$

$$k_{empt}(Q_{sto}) = k_{\min} + \frac{k_{\max} - k_{\min}}{2} \quad (S3f)$$

$$\{\tanh[\alpha(Q_{sto} - b \cdot D)] - \tanh[\beta(Q_{sto} - c \cdot D)] + 2\} \quad (S3g)$$

Here  $Q_{sto}$  (in mg) is the amount of glucose in the stomach,  $Q_{sto1}$  (in mg) is the amount of liquid glucose in the stomach,  $Q_{sto2}$  (in mg) is the amount of solid glucose in the stomach,  $Q_{gut}$  (in mg) is the glucose mass in the intestine;  $D$  (in mg) is the amount of ingested glucose at time

$\tau_D$ ;  $BW$  (in kg) is body weight;  $k_{empt}$  is the rate constant of the gastric emptying;  $K_{gri}$ ,  $k_{abs}$ ,  $k_{max}$ ,  $k_{min}$ ,  $f$ ,  $\alpha$ ,  $\beta$  are the parameters.

**Endogenous glucose production:**

$$EGP(t) = k_{p1} - k_{p2}G_p(t) - k_{p3}X^L(t) + \xi X^H(t), \quad EGP(0) = EGP_b \quad (S4a)$$

$$\dot{I}'(t) = -k_i [I'(t) - I(t)], \quad I'(0) = I_b \quad (S4b)$$

$$\dot{X}^L(t) = -k_i [X^L(t) - I'(t)], \quad X^L(0) = I_b \quad (S4c)$$

$$\dot{X}^H(t) = -k_H X^H(t) + k_H \times \max [H(t) - H_b, 0], \quad X^H(0) = 0 \quad (S4d)$$

Here  $X^L$  (in ) is delayed insulin action on  $EGP$ ;  $X^H$  is delayed glucagon action on  $EGP$ ;  $I'$  is delayed insulin in compartment 1;  $k_{p1}$ ,  $k_{p2}$ ,  $k_{p3}$ ,  $\xi$ ,  $k_i$ ,  $k_H$  are the parameters.

**Glucose utilization:**

$$U_{ii}(t) = F_{cns} \quad (S5a)$$

$$U_{id}(t) = \frac{[V_{m0} + V_{mx} \cdot X(t)]G_t(t)}{K_{m0} + G_t(t)} \quad (S5b)$$

$$\dot{X}(t) = -p_{2U}X(t) + p_{2U}[I(t) - I_b], \quad X(0) = 0 \quad (S5c)$$

Here  $U_{ii}$  (in mg/kg/min) and  $U_{id}$  (in mg/kg/min) are insulin-independent and insulin-dependent glucose utilization;  $X$  (in pmol/L) is insulin in interstitial fluid;  $F_{cns}$ ,  $V_{m0}$ ,  $K_{m0}$ ,  $p_{2U}$  are the parameters.

**Renal excretion:**

$$E(t) = \begin{cases} k_{e1}[G_p(t) - k_{e2}] & \text{if } G_p(t) > k_{e2} \\ 0 & \text{if } G_p(t) \leq k_{e2} \end{cases} \quad (S6)$$

Here  $E(t)$  (in mg/kg/min) is the glucose renal exertion;  $k_{e1}$  is the parameter.

**Glucagon kinetics and secretion:**

$$\dot{H}(t) = -nH(t) + SR_H(t) + Ra_H(t), \quad H(0) = H_b \quad (S7a)$$

$$SR_H(t) = SR_H^s(t) + SR_H^d(t), \quad (S7b)$$

$$\dot{SR}_H^s(t) = -\rho \left[ SR_H^s(t) - \max \left( \frac{\sigma[G_{th} - G(t)]}{\max(I(t) - I_{th}, 0) + 1} + SR_H^b, 0 \right) \right], \quad SR_H^s(0) = nH_b \quad (S7c)$$

$$SR_H^d(t) = \delta \max \left( -\frac{dG(t)}{dt}, 0 \right) \quad (S7d)$$

Here  $H$  (in ng/L) is the concentration of plasma glucagon;  $SR_H$  (in ng/L/min) is the glucagon secretion;  $Ra_H$  (in ng/L/min) is the rate of appearance of glucagon in plasma;  $SR_H^s$  (in ng/L/min) and  $SR_H^d$  (in ng/L/min) is the static and dynamic components of glucagon, respectively;  $n$ ,  $\rho$ ,  $I_{th}$ ,  $\delta$  are the parameters.

**Subcutaneous insulin kinetics:**

$$R_{ia}(t) = k_{a1}I_{sc1}(t) + k_{a2}I_{sc2}(t) \quad (S8a)$$

$$\dot{I}_{sc1}(t) = -(k_d + k_{a1})I_{sc1}(t) + IIR(t), \quad I_{sc1}(0) = I_{sc1ss} \quad (S8b)$$

$$\dot{I}_{sc2}(t) = k_d \cdot I_{sc1}(t) - k_{a2}I_{sc2}(t), \quad I_{sc2}(0) = I_{sc2ss} \quad (S8c)$$

$$IIR(t) = IIR_b + \frac{u_I(t)}{BW} \quad (S8d)$$

Here  $R_{ia}$  (in pmol/kg/min) is the rate of appearance of insulin in plasma;  $I_{sc1}$  (in pmol/kg) is the amount of nonmonomeric insulin in the subcutaneous space;  $I_{sc2}$  is the amount of monomeric insulin in the subcutaneous space;  $IIR(t)$  is the insulin infusion rate where  $IIR_b$  is the basal infusion rate (in pmol/kg/min) from body and  $u_I$  (in pmol/min) is the external insulin infusion rate;  $k_{a1}, k_{a2}, k_d$  are the parameters. As the exogenous insulin infusion rate appears in the above equation in pmol/kg/min, we divide  $u_I$  by the body weight  $BW$  in the equation. Note that here the  $u_I$  is in pmol/min. To convert the unit of insulin infusion rate  $u_I$  from U/min to pmol/min, we multiply  $u_I$  by 6944.4, that is the unit conversion is 1 U/min = 6944.4 pmol/min.

**Subcutaneous glucagon kinetics:**

$$\dot{H}_{sc1}(t) = -(k_{h1} + k_{h2})H_{sc1}(t) + GIR(t), \quad H_{sc1}(0) = H_{sc1ss} \quad (S9a)$$

$$\dot{H}_{sc2}(t) = k_{h1}H_{sc1}(t) - k_{h3}H_{sc2}(t), \quad H_{sc2}(0) = H_{sc2ss} \quad (S9b)$$

$$Ra_H(t) = k_{h3}H_{sc2}(t) \quad (S9c)$$

$$GIR(t) = GIR_b + \frac{u_G(t)}{BV} \quad (S9d)$$

Here  $H_{sc1}$  (in ng/L) and  $H_{sc2}$  (in ng/L) are the glucagon concentration in the subcutaneous space;  $IGR$  is the glucagon infusion rate where  $GIR_b$  is the basal glucagon infusion rate (in ng/L/min) from the body and  $u_I$  is the external glucagon infusion rate (in ng/min);  $k_{h1}, k_{h2}, k_{h3}$  are the parameters. As the exogenous glucagon infusion rate appears in the above equation in ng/L/min, we divide  $u_G$  by the body volume  $BV$  in the equation. Note that here the  $u_G$  is in ng/min. To convert the unit of glucagon infusion rate from mg/min to ng/min, we multiply  $u_G$  by  $10^6$ , that is the unit conversion is 1 mg/min =  $10^6$  ng/min.

We write the ODEs in Eqs. (S1)-(S9) in the form  $\dot{\mathbf{x}}(t) = \mathbf{f}(\mathbf{x}(t), \mathbf{u}(t), \Theta_{Gb})$  where  $\mathbf{x} \in \mathbb{R}^{17}$  and  $t$  is the physical time (in min). The variable  $x_1$  represents  $G_p$ , the mass of glucose in plasma; the variable  $x_2$  represents  $G_t$ , the mass of glucose in tissue; the variable  $x_3$  represents the mass of liver insulin  $I_l$ ; the variable  $x_4$  represents the mass of plasma insulin  $I_p$ ; the variable  $x_5$  represents the amount of delayed insulin  $I'$  in compartment 1; the variable  $x_6$  represents the amount of delayed insulin  $X^L$  action on  $EGP$ ; the variable  $x_7$  represents the amount of solid glucose  $Q_{sto1}$  in the stomach; the variable  $x_8$  represents the amount of liquid glucose  $Q_{sto2}$  in the stomach; the variable  $x_9$  represents the glucose mass  $Q_{gut}$  in the intestine; the variable  $x_{10}$  represents the amount of interstitial fluid  $X$ ; the variable  $x_{11}$  represents the amount of static glucagon  $SR_H^s$ ; the variable  $x_{12}$  represents the amount of plasma glucagon  $H$ ; the variable  $x_{13}$  represents the amount of delayed glucagon  $X^H$  action on  $EGP$ ; the variable  $x_{14}$  represents the amount of nonmonomeric insulin  $I_{sc1}$  in the subcutaneous space; the variable  $x_{15}$  represents the amount of monomeric insulin  $I_{sc2}$  in the subcutaneous space; the variable  $x_{16}$  represents the amount of subcutaneous glucagon  $H_{sc1}$  in the subcutaneous space; the variable  $x_{17}$  represents the amount of subcutaneous glucagon  $H_{sc2}$  in the subcutaneous space. Also  $\mathbf{u}(t) = [u_I(t) \quad u_G(t)]^T$ , where  $u_I$  is the external insulin and  $u_G$  is the external glucagon. We define  $\Theta_{Gb}$  as the set of parameters for which the basal glucose level is  $G_b$ .

**Parameters**

There are a total of 46 parameters in Eqs. (S1)-(S9). The parameters are not given in [3]. We set all the parameters for ‘Glucose subsystem’, ‘Insulin subsystem’, ‘Glucose rate of appearance’, ‘Endogenous glucose production’, ‘Glucose utilization’, ‘Glucose utilization’, ‘Renal excretion’, ‘Subcutaneous insulin kinetics’ from the references [1,2], except  $k_{p1}, V_{m0}$  and  $HE_b$ . According to [2], the parameters are chosen to satisfy the steady-state constraints in type I diabetes. The parameters  $k_{p1}$  and  $V_{m0}$  are set so that the steady state solutions provide the basal Glucose level  $G_b$  and  $EGP_b = 2.4$ . In Type I diabetes, the endogenous glucose production is high [2], so we choose  $EGP_b = 2.4$  mg/kg/min. We set  $IIR_b = 0$  and  $GIR_b = 0$  as the model we consider is for Type I diabetes. The commercial version of the UVA/Pavoda simulator [67] allows computing blood glucose responses to supplied dosages of insulin for some patients, but does

not provide all of the parameters. We tune the parameter  $HE_b$  so that the blood glucose response to insulin of the *patient* we consider in this paper is qualitatively similar to the blood glucose response to insulin of a patient from the software [67] (`adultaverage.mat`). All of the parameters we use are listed in the S1 Table for reproducibility of the results. Our implementation of the model [3] has been published in GitHub [68].

The equations for  $k_{p1}$  and  $V_{m0}$  are given below:

$$k_{p1} = EGP_b + k_{p2}G_{pb} + k_{p3}I_b \quad (S10a)$$

$$V_{m0} = \frac{(EGP_b - F_{cns})(K_{m0} + G_{tb})}{G_{tb}} \quad (S10b)$$

The basal steady states are given below:

$$G_{pb} = G_b \cdot V_g \quad (S11a)$$

$$G_{tb} = \frac{F_{cns} - EGP_b + k_1 G_{pb}}{k_2} \quad (S11b)$$

$$I_{lb} = I_{pb} \cdot \frac{m_2}{m_1 + m_3} \quad (S11c)$$

$$I_{pb} = \frac{IIR_b}{m_2 + m_4 - \frac{m_1 m_2}{m_1 + m_3}} \quad (S11d)$$

$$I_{sc1ss} = \frac{IIR_b}{k_d + k_{a1}} \quad (S11e)$$

$$I_{sc2ss} = \frac{k_d}{k_{a2}} I_{sc1ss} \quad (S11f)$$

$$SR_{Hb}^s = nH_b \quad (S11g)$$

$$H_{sc1ss} = \frac{GIR_b}{k_{h1} + k_{h2}} \quad (S11h)$$

$$H_{sc2ss} = \frac{k_{h1}}{k_{h3}} H_{sc1ss} \quad (S11i)$$

Here, the basal values  $G_b$  (in mg/dL),  $IIR_b$  (in pmol/kg/min) and  $GIR_b$  (in ng/L/min) are settable by the user.
