# Supplementary material for: Optimal regulation of blood glucose level in Type I diabetes using insulin and glucagon
Source: PubMed Central journal article supplement (PMC6426249; doi:10.1371/journal.pone.0213665), 2019-03-20
Supplement: pone.0213665.s003.pdf [file pone.0213665.s003.pdf]

### S3 Appendix: Continuous Approximation of Non-differential Function in ODEs

The optimization algorithms implemented in *PSOPT* require the derivatives of the function  $\mathbf{f}(\mathbf{x}(t), \mathbf{u}(t), \Theta_{G_b})$  exists. We notice that there are discontinuities in Eqs. (S1)-(S9). The smooth approximation of the Renal exertion function  $E(t)$  in Eq. (S6) by using a Heaviside function is,

$$E(t) = k_{e1}(G_p(t) - k_{e2}) \times \mathcal{H}(G_p(t), k_{e2}, k), \quad (\text{S12})$$

where,

$$\mathcal{H}(G_p(t), k_{e2}, k) = \frac{1}{1 + e^{-k(G_p - k_{e2})}}, k \in \mathbb{Z}. \quad (\text{S13})$$

Here a larger  $k$  corresponds to a sharper transition around  $G_p(t) = k_{e2}$ . We define a continuous approximation of the Dirac delta function  $\delta(t - \tau_D)$  in Eq. (S3c),

$$\delta(t - \tau_D) = \frac{d}{dt} \mathcal{H}(t, \tau_D, k), \quad (\text{S14})$$

where  $\mathcal{H}(t, \tau_D, k) = \frac{1}{1 + e^{-k(t - \tau_D)}}$ ,  $k \in \mathbb{Z}$ . Here a larger  $k$  corresponds to a sharper transition at  $t = \tau_D$ .

We also define continuous approximation of the  $\max(\cdot)$  function, e.g. in Eq. (S4d), as

$$\max(H(t) - H_b, 0) = (H(t) - H_b) \times \mathcal{H}(H(t), H_b, k), \quad (\text{S15})$$

where  $\mathcal{H}(H(t), H_b, k) = \frac{1}{1 + e^{-k(H - H_b)}}$ ,  $k \in \mathbb{Z}$ . Here a larger  $k$  corresponds to a sharper transition at  $H(t) = H_b$ . In all our approximation we set  $k = 4$ .
