# Supplementary material for: Optimal regulation of blood glucose level in Type I diabetes using insulin and glucagon
Source: PubMed Central journal article supplement (PMC6426249; doi:10.1371/journal.pone.0213665), 2019-03-20
Supplement: pone.0213665.s004.pdf [file pone.0213665.s004.pdf]

**Table S1 Table.** Average parameters

| Parameter | Type I Value        | Unit                 |
|-----------|---------------------|----------------------|
| $BW$      | 78 [1]              | Kg                   |
| $BV$      | 78 [1]              | L                    |
| $V_g$     | 1.49 [1]            | dL/kg                |
| $k_1$     | 0.065 [1,2]         | min <sup>-1</sup>    |
| $k_2$     | 0.079 [1,2]         | min <sup>-1</sup>    |
| $V_I$     | 0.04 [1]            | L/kg                 |
| $m_1$     | 0.379 [1]           | min <sup>-1</sup>    |
| $m_2$     | 0.673 [1]           | min <sup>-1</sup>    |
| $m_4$     | 0.269 [1]           | min <sup>-1</sup>    |
| $m_5$     | 0.0526 [1]          | min.kg/pmol          |
| $m_6$     | 0.8118 [1]          | dimensionless        |
| $HE_b$    | 0.112[1]            | dimensionless        |
| $k_{p1}$  | change Eq. (??)     | mg/kg/min            |
| $k_{p2}$  | 0.0021 [1,2]        | min <sup>-1</sup>    |
| $k_{p3}$  | 0.009 [1,2]         | mg/kg/min per pmol/L |
| $k_{p4}$  | 0.0786 [1]          | mg/kg/min per pmol/L |
| $k_i$     | 0.0066 [1]          | min <sup>-1</sup>    |
| $k_{max}$ | 0.0465 [1]          | min <sup>-1</sup>    |
| $k_{min}$ | 0.0076 [1]          | min <sup>-1</sup>    |
| $k_{abs}$ | 0.023 [1]           | min <sup>-1</sup>    |
| $k_{gri}$ | 0.0465 [1]          | min <sup>-1</sup>    |
| $f$       | 0.9 [1]             | dimensionless        |
| $a$       | 0.00016 [1]         | mg <sup>-1</sup>     |
| $b$       | 0.68 [1]            | dimensionless        |
| $c$       | 0.00023 [1]         | mg <sup>-1</sup>     |
| $d$       | 0.009 [1]           | dimensionless        |
| $F_{cns}$ | 1 [1]               | mg/kg/min            |
| $V_{m0}$  | changes (Eq. (S10)) | mg/kg/min            |
| $V_{mx}$  | 0.034 [1]           | mg/kg/min per pmol/L |
| $K_{m0}$  | 4661.21             | mg/kg                |
| $P_{2u}$  | 0.084 [1]           | min <sup>-1</sup>    |
| $k_{e1}$  | 0.0007 [1]          | min <sup>-1</sup>    |
| $k_{e2}$  | 269 [1]             | mg/kg                |
| $k_d$     | 0.0164 [2]          | min <sup>-1</sup>    |
| $k_{a1}$  | 0.0018 [2]          | min <sup>-1</sup>    |
| $k_{a2}$  | 0.0182 [2]          | min <sup>-1</sup>    |
| $\delta$  | 0.682 [3]           | (ng/L per mg/dL)     |
| $\sigma$  | 1.093 [3]           | min <sup>-1</sup>    |
| $n$       | 0.15 [3]            | min <sup>-1</sup>    |
| $\zeta$   | 0.009 [3]           | (mg/kg/min per ng/L) |
| $\rho$    | 0.57 [3]            | (ng/L/min per mg/dL) |
| $k_H$     | 0.16 [3]            | min <sup>-1</sup>    |
| $I_{th}$  | $I_b$ [3]           | (pmol/L)             |
| $G_{th}$  | $G_b$ [3]           | mg/dL                |
| $k_{h1}$  | 0.0164 [3]          | min <sup>-1</sup>    |
| $k_{h2}$  | 0.0018 [3]          | min <sup>-1</sup>    |
| $k_{h3}$  | 0.0182 [3]          | min <sup>-1</sup>    |
