# Supplementary material for: Optimal regulation of blood glucose level in Type I diabetes using insulin and glucagon
Source: PubMed Central journal article supplement (PMC6426249; doi:10.1371/journal.pone.0213665), 2019-03-20
Supplement: pone.0213665.s005.pdf [file pone.0213665.s005.pdf]

**Table S2 Table.** Basal values

| Basal   | Type I Value | Unit        |
|---------|--------------|-------------|
| $X_b^H$ | 0 [69]       | pmol/L      |
| $EGP_b$ | 2.4 [2]      | mg/kg/min   |
| $H_b$   | 93 [69]      | ng/L        |
| $IIR_b$ | 0 [2]        | pmol/kg/min |
